# Supplementary material for: Interaction of some divalent metal acetylacetonates with Al, Ti, Nb and Ta isopropoxides. Factors influencing the formation and stability of heterometallic alkoxide complexesElectronic supplementary information (ESI) available: synthesis details for 5–7; microanalysis data for 1–9; tables of selected bond lengths and angles for 1–5 and 7–9; variable temperature 1H NMR spectra for 7 and 8; UV-Vis spectrum of 6 in toluene after various times. See http://www.rsc.org/suppdata/dt/b2/b206662a/
Source: Royal Society of Chemistry journal article supplement (doi:10.1039/b206662a), 2003-01-27
Supplement: b206662a-2.pdf [file b206662a-2.pdf]

Table TS1 - Microanalysis data for the compounds studied

| Chemical<br>Composition                   | Found |     | Calculated |     |
|-------------------------------------------|-------|-----|------------|-----|
|                                           | C     | H   | C          | H   |
| $C_{40}H_{84}Co_2O_{14}Ti_2$ ( <b>1</b> ) | 46.7  | 8.0 | 47.9       | 8.4 |
| $C_{26}H_{44}Co_2O_{10}$ ( <b>2</b> )     | 48.6  | 6.4 | 49.2       | 7.0 |
| $C_{42}H_{98}Co_2O_{14}Ta_2$ ( <b>3</b> ) | 38.8  | 7.8 | 38.6       | 7.6 |
| $C_{36}H_{84}Nb_2NiO_{12}$ ( <b>4</b> )   | 45.7  | 9.0 | 45.3       | 8.9 |
| $C_{32}H_{56}Al_2CoO_{12}$ ( <b>5</b> )   | 51.1  | 7.2 | 51.5       | 7.6 |
| $C_{32}H_{56}Al_2NiO_{12}$ ( <b>6</b> )   | 51.0  | 7.2 | 51.6       | 7.6 |
| $C_{32}H_{56}Al_2MgO_{12}$ ( <b>7</b> )   | 53.2  | 7.5 | 54.0       | 7.9 |
| $C_{38}H_{70}Al_2O_{14}Zn_2$ ( <b>8</b> ) | 47.6  | 7.0 | 48.8       | 7.5 |
| $C_{26}H_{44}Ni_2O_{10}$ ( <b>9</b> )     | 48.9  | 6.9 | 49.3       | 7.0 |
