# Supplementary material for: Interaction of some divalent metal acetylacetonates with Al, Ti, Nb and Ta isopropoxides. Factors influencing the formation and stability of heterometallic alkoxide complexesElectronic supplementary information (ESI) available: synthesis details for 5–7; microanalysis data for 1–9; tables of selected bond lengths and angles for 1–5 and 7–9; variable temperature 1H NMR spectra for 7 and 8; UV-Vis spectrum of 6 in toluene after various times. See http://www.rsc.org/suppdata/dt/b2/b206662a/
Source: Royal Society of Chemistry journal article supplement (doi:10.1039/b206662a), 2003-01-27
Supplement: b206662a-3.pdf [file b206662a-3.pdf]

Table TS2 Selected bond distances (Å) and angles (°) in the structure of **1**

|                 |           |                   |          |
|-----------------|-----------|-------------------|----------|
| Ti(1)-O(2)      | 1.768(10) | Ti(1)-Co(1)       | 3.068(4) |
| Ti(1)-O(5)      | 1.770(9)  | Co(1)-O(6)        | 1.921(8) |
| Ti(1)-O(7)      | 1.966(10) | Co(1)-O(6)#1      | 1.943(8) |
| Ti(1)-O(1)      | 2.005(9)  | Co(1)-O(7)        | 1.952(9) |
| Ti(1)-O(3)      | 2.023(10) | Co(1)-O(1)        | 1.945(9) |
| Ti(1)-O(4)      | 2.099(10) | Co(1)-Co(1)#1     | 2.957(4) |
| O(2)-Ti(1)-O(5) | 97.2(4)   | O(1)-Ti(1)-O(3)   | 89.4(4)  |
| O(2)-Ti(1)-O(7) | 97.7(4)   | O(2)-Ti(1)-O(4)   | 86.9(4)  |
| O(5)-Ti(1)-O(7) | 100.6(4)  | O(5)-Ti(1)-O(4)   | 171.3(4) |
| O(2)-Ti(1)-O(1) | 169.4(4)  | O(6)-Co(1)-O(6)#1 | 80.2(4)  |
| O(5)-Ti(1)-O(1) | 92.6(4)   | O(6)-Co(1)-O(7)   | 127.9(4) |
| O(7)-Ti(1)-O(1) | 76.4(4)   | O(6)#1-Co(1)-O(7) | 124.1(4) |
| O(2)-Ti(1)-O(3) | 94.6(4)   | O(6)-Co(1)-O(1)   | 125.6(3) |
| O(5)-Ti(1)-O(3) | 90.6(4)   | O(6)#1-Co(1)-O(1) | 128.2(3) |
| O(7)-Ti(1)-O(3) | 162.2(4)  | O(7)-Co(1)-O(1)   | 78.1(4)  |

Symmetry transformations used to generate equivalent atoms:

#1 -x,-y,-z

Table TS3 Selected bond distances (Å) and angles (°) in the structure of **2**

|                 |            |                   |            |
|-----------------|------------|-------------------|------------|
| Co(1)-O(4)      | 2.009(3)   | Co(1)-O(2)        | 2.064(3)   |
| Co(1)-O(3)      | 2.037(3)   | Co(1)-O(1)        | 2.151(3)   |
| Co(1)-O(5)      | 2.042(3)   | Co(1)-O(2)#1      | 2.159(3)   |
| O(4)-Co(1)-O(3) | 87.13(11)  | O(4)-Co(1)-O(1)   | 94.06(13)  |
| O(4)-Co(1)-O(5) | 90.16(11)  | O(3)-Co(1)-O(1)   | 96.61(12)  |
| O(3)-Co(1)-O(5) | 96.00(12)  | O(5)-Co(1)-O(1)   | 166.88(12) |
| O(4)-Co(1)-O(2) | 176.90(11) | O(2)-Co(1)-O(1)   | 86.84(12)  |
| O(3)-Co(1)-O(2) | 89.82(11)  | O(4)-Co(1)-O(2)#1 | 103.03(11) |
| O(5)-Co(1)-O(2) | 89.61(11)  | O(3)-Co(1)-O(2)#1 | 169.57(10) |

Symmetry transformations used to generate equivalent atoms:

#1 -x+1,-y+2,-z

Table TS4 Selected bond distances (Å) and angles (°) in the structure of **3**

|                 |           |                   |           |
|-----------------|-----------|-------------------|-----------|
| Ta(1)-O(3)      | 1.88(2)   | Co(1)-O(6)#1      | 1.926(19) |
| Ta(1)-O(5)      | 1.902(18) | Co(1)-O(6)        | 1.934(17) |
| Ta(1)-O(7)      | 1.939(19) | Co(1)-O(1)        | 1.934(17) |
| Ta(1)-O(2)      | 1.96(2)   | Co(1)-O(2)        | 1.97(2)   |
| Ta(1)-O(1)      | 1.99(2)   | Co(1)-Co(1)#1     | 2.963(8)  |
| O(4)-Ta(1)-O(3) | 103.8(10) | O(7)-Ta(1)-O(2)   | 88.9(9)   |
| O(4)-Ta(1)-O(5) | 94.0(13)  | O(4)-Ta(1)-O(1)   | 162.5(10) |
| O(3)-Ta(1)-O(5) | 92.7(9)   | O(3)-Ta(1)-O(1)   | 92.9(7)   |
| O(4)-Ta(1)-O(7) | 88.2(12)  | O(6)#1-Co(1)-O(6) | 79.7(8)   |
| O(3)-Ta(1)-O(7) | 91.4(10)  | O(6)#1-Co(1)-O(1) | 125.2(7)  |
| O(5)-Ta(1)-O(7) | 174.7(12) | O(6)-Co(1)-O(1)   | 132.4(9)  |
| O(4)-Ta(1)-O(2) | 93.0(11)  | O(6)#1-Co(1)-O(2) | 129.7(9)  |
| O(3)-Ta(1)-O(2) | 163.2(9)  | O(6)-Co(1)-O(2)   | 127.0(9)  |
| O(5)-Ta(1)-O(2) | 86.2(9)   | O(1)-Co(1)-O(2)   | 71.5(9)   |

Symmetry transformations used to generate equivalent atoms:

#1 -x,-y,-z

Table TS5 Selected bond distances (Å) and angles (°) in the structure of **4**

|                     |           |                   |           |
|---------------------|-----------|-------------------|-----------|
| Ni(1)-O(2)          | 1.890(14) | Nb(1)-O(10)       | 1.922(15) |
| Ni(1)-O(3)          | 1.933(13) | Nb(1)-O(9)        | 1.964(15) |
| Ni(1)-O(1)          | 1.944(12) | Nb(1)-O(7)        | 1.955(18) |
| Ni(1)-O(4)          | 1.949(13) | Nb(1)-O(8)        | 1.979(16) |
| Nb(1)-O(5)          | 1.717(17) | Nb(1)-O(2)        | 2.059(14) |
| Nb(1)-O(6)          | 1.734(18) | Nb(1)-O(3)        | 2.059(12) |
| Nb(1)-O(11)         | 1.814(14) | Nb(1)-O(4)        | 2.149(14) |
| Nb(1)-O(12)         | 1.830(15) | Nb(1)-O(1)        | 2.164(13) |
| O(2)-Ni(1)-O(2)#1   | 129.2(12) | O(5)-Nb(1)-O(6)   | 86.3(8)   |
| O(2)-Ni(1)-O(3)#1   | 176.3(8)  | O(5)-Nb(1)-O(11)  | 138.4(8)  |
| O(2)#1-Ni(1)-O(3)#1 | 48.3(7)   | O(6)-Nb(1)-O(11)  | 93.7(8)   |
| O(2)-Ni(1)-O(3)     | 48.3(6)   | O(5)-Nb(1)-O(12)  | 94.8(8)   |
| O(2)#1-Ni(1)-O(3)   | 176.3(8)  | O(6)-Nb(1)-O(12)  | 137.8(8)  |
| O(3)#1-Ni(1)-O(3)   | 134.4(9)  | O(11)-Nb(1)-O(12) | 58.7(8)   |
| O(2)-Ni(1)-O(1)     | 78.9(6)   | O(5)-Nb(1)-O(10)  | 174.0(7)  |
| O(2)#1-Ni(1)-O(1)   | 127.8(6)  | O(6)-Nb(1)-O(10)  | 87.7(7)   |
| O(3)#1-Ni(1)-O(1)   | 100.6(5)  | O(11)-Nb(1)-O(10) | 42.2(6)   |
| O(3)-Ni(1)-O(1)     | 55.6(6)   | O(12)-Nb(1)-O(10) | 89.8(7)   |
| O(3)#1-Ni(1)-O(4)#1 | 78.9(6)   | O(5)-Nb(1)-O(9)   | 90.4(8)   |

Symmetry transformations used to generate equivalent atoms:

#1 -x,y,-z+1/2

Table TS6 Selected bond distances (Å) and angles (°) in the structure of **5**

|                     |            |                   |            |
|---------------------|------------|-------------------|------------|
| Co(1)-O(2)          | 1.940(4)   | Al(1)-O(4)        | 1.892(5)   |
| Co(1)-O(1)          | 1.944(4)   | Al(1)-O(3)        | 1.896(4)   |
| Co(1)-Al(1)         | 2.934(2)   | Al(1)-O(6)        | 1.897(5)   |
| Al(1)-O(1)          | 1.851(4)   | Al(1)-O(5)        | 1.900(4)   |
| Al(1)-O(2)#1        | 1.859(4)   |                   |            |
| O(2)-Co(1)-O(2)#1   | 121.9(2)   | O(2)#1-Al(1)-O(4) | 94.98(19)  |
| O(2)-Co(1)-O(1)     | 134.53(15) | O(1)-Al(1)-O(3)   | 95.16(19)  |
| O(2)#1-Co(1)-O(1)   | 76.67(15)  | O(2)#1-Al(1)-O(3) | 175.9(2)   |
| O(2)-Co(1)-O(1)#1   | 76.67(15)  | O(4)-Al(1)-O(3)   | 88.91(18)  |
| O(2)#1-Co(1)-O(1)#1 | 134.53(15) | O(1)-Al(1)-O(6)   | 91.81(17)  |
| O(1)-Co(1)-O(1)#1   | 122.0(2)   | O(2)#1-Al(1)-O(6) | 91.67(19)  |
| Al(1)-Co(1)-Al(1)#1 | 179.93(9)  | O(4)-Al(1)-O(6)   | 87.11(19)  |
| O(1)-Al(1)-O(2)#1   | 80.98(16)  | O(3)-Al(1)-O(6)   | 89.7(2)    |
| O(1)-Al(1)-O(4)     | 175.8(2)   | O(6)-Al(1)-O(5)   | 175.94(19) |

Symmetry transformations used to generate equivalent atoms:

#1 -x+1,y,-z+3/2

Table TS7 Selected bond distances (Å) and angles (°) in the structure of **7**

|                     |            |                   |            |
|---------------------|------------|-------------------|------------|
| Mg(1)-O(3)          | 1.935(2)   | Al(1)-O(3)        | 1.862(3)   |
| Mg(1)-Al(1)         | 2.9043(16) | Al(1)-O(1)        | 1.896(3)   |
|                     |            | Al(1)-O(2)        | 1.900(3)   |
| O(3)-Mg(1)-O(3)#1   | 78.37(14)  | O(3)#1-Al(1)-O(3) | 82.10(15)  |
| O(3)-Mg(1)-O(3)#2   | 133.51(14) | O(3)-Al(1)-O(1)#1 | 95.19(11)  |
| O(3)#1-Mg(1)-O(3)#2 | 120.87(14) | O(3)#1-Al(1)-O(1) | 95.19(11)  |
| O(3)-Mg(1)-O(3)#3   | 120.87(14) | O(3)-Al(1)-O(1)   | 176.91(11) |
| O(3)#1-Mg(1)-O(3)#3 | 133.52(14) | O(1)#1-Al(1)-O(1) | 87.56(16)  |
| O(3)#2-Mg(1)-O(3)#3 | 78.37(14)  | O(3)#1-Al(1)-O(2) | 91.48(11)  |
| Al(1)-Mg(1)-Al(1)#2 | 180.0      | O(3)-Al(1)-O(2)   | 91.87(11)  |

Symmetry transformations used to generate equivalent atoms:

#1 -x+0,-y+1/2,z #2 -x,y,-z+3/2 #3 x+0,-y+1/2,-z+3/2

Table TS8 Selected bond distances (Å) and angles (°) in the structure of **8**

|                     |            |                 |          |
|---------------------|------------|-----------------|----------|
| Zn(1)-O(8)          | 1.946(5)   | Al(1)-O(6)      | 1.866(6) |
| Zn(1)-O(7)          | 1.949(5)   | Al(1)-O(2)      | 1.879(8) |
| Zn(1)-O(6)          | 1.954(6)   | Al(1)-O(5)      | 1.872(7) |
| Zn(1)-O(5)          | 1.959(6)   | Al(1)-O(1)      | 1.901(7) |
| Zn(1)-Zn(1)#1       | 2.934(2)   | Al(1)-O(3)      | 1.906(7) |
| Zn(1)-Al(1)         | 2.942(3)   | Al(1)-O(4)      | 1.906(7) |
| O(8)-Zn(1)-O(7)     | 82.2(3)    | O(6)-Al(1)-O(5) | 81.7(3)  |
| O(8)-Zn(1)-O(6)     | 122.9(2)   | O(2)-Al(1)-O(5) | 175.7(3) |
| O(7)-Zn(1)-O(6)     | 129.75(19) | O(6)-Al(1)-O(1) | 93.7(3)  |
| O(8)-Zn(1)-O(5)     | 129.0(2)   | O(2)-Al(1)-O(1) | 90.3(3)  |
| O(7)-Zn(1)-O(5)     | 122.7(2)   | O(5)-Al(1)-O(1) | 90.6(3)  |
| O(6)-Zn(1)-O(5)     | 77.3(3)    | O(6)-Al(1)-O(3) | 176.3(3) |
| Zn(1)#1-Zn(1)-Al(1) | 179.71(8)  | O(2)-Al(1)-O(3) | 89.6(3)  |
| O(6)-Al(1)-O(2)     | 94.1(3)    | O(5)-Al(1)-O(3) | 94.7(3)  |

Symmetry transformations used to generate equivalent atoms:

#1 -x,y,-z+1/2 #2 -x+1,y,-z+1/2

Table TS9 Selected bond distances (Å) and angles (°) in the structure of **9**

|                   |          |                   |           |
|-------------------|----------|-------------------|-----------|
| Ni(1)-O(2)        | 1.982(9) | Ni(1)-O(1)        | 2.051(7)  |
| Ni(1)-O(3)        | 1.997(8) | Ni(1)-O(1)#1      | 2.136(8)  |
| Ni(1)-O(8)        | 2.022(7) | Ni(1)-O(6)        | 2.146(10) |
| O(2)-Ni(1)-O(3)   | 86.2(3)  | O(3)-Ni(1)-O(1)#1 | 101.7(3)  |
| O(2)-Ni(1)-O(8)   | 94.7(3)  | O(8)-Ni(1)-O(1)#1 | 87.2(3)   |
| O(3)-Ni(1)-O(8)   | 90.6(3)  | O(1)-Ni(1)-O(1)#1 | 79.9(3)   |
| O(2)-Ni(1)-O(1)   | 92.2(3)  | O(2)-Ni(1)-O(6)   | 97.2(4)   |
| O(3)-Ni(1)-O(1)   | 178.2(3) | O(3)-Ni(1)-O(6)   | 93.8(4)   |
| O(8)-Ni(1)-O(1)   | 90.2(3)  | O(8)-Ni(1)-O(6)   | 167.6(4)  |
| O(2)-Ni(1)-O(1)#1 | 171.8(3) | O(1)-Ni(1)-O(6)   | 85.7(3)   |

Symmetry transformations used to generate equivalent atoms:

#1 -x+1,-y+2,-z
