# Supplementary figures and images for: Interaction of some divalent metal acetylacetonates with Al, Ti, Nb and Ta isopropoxides. Factors influencing the formation and stability of heterometallic alkoxide complexesElectronic supplementary information (ESI) available: synthesis details for 5–7; microanalysis data for 1–9; tables of selected bond lengths and angles for 1–5 and 7–9; variable temperature 1H NMR spectra for 7 and 8; UV-Vis spectrum of 6 in toluene after various times. See http://www.rsc.org/suppdata/dt/b2/b206662a/
Source: Royal Society of Chemistry journal article supplement (doi:10.1039/b206662a), 2003-01-27

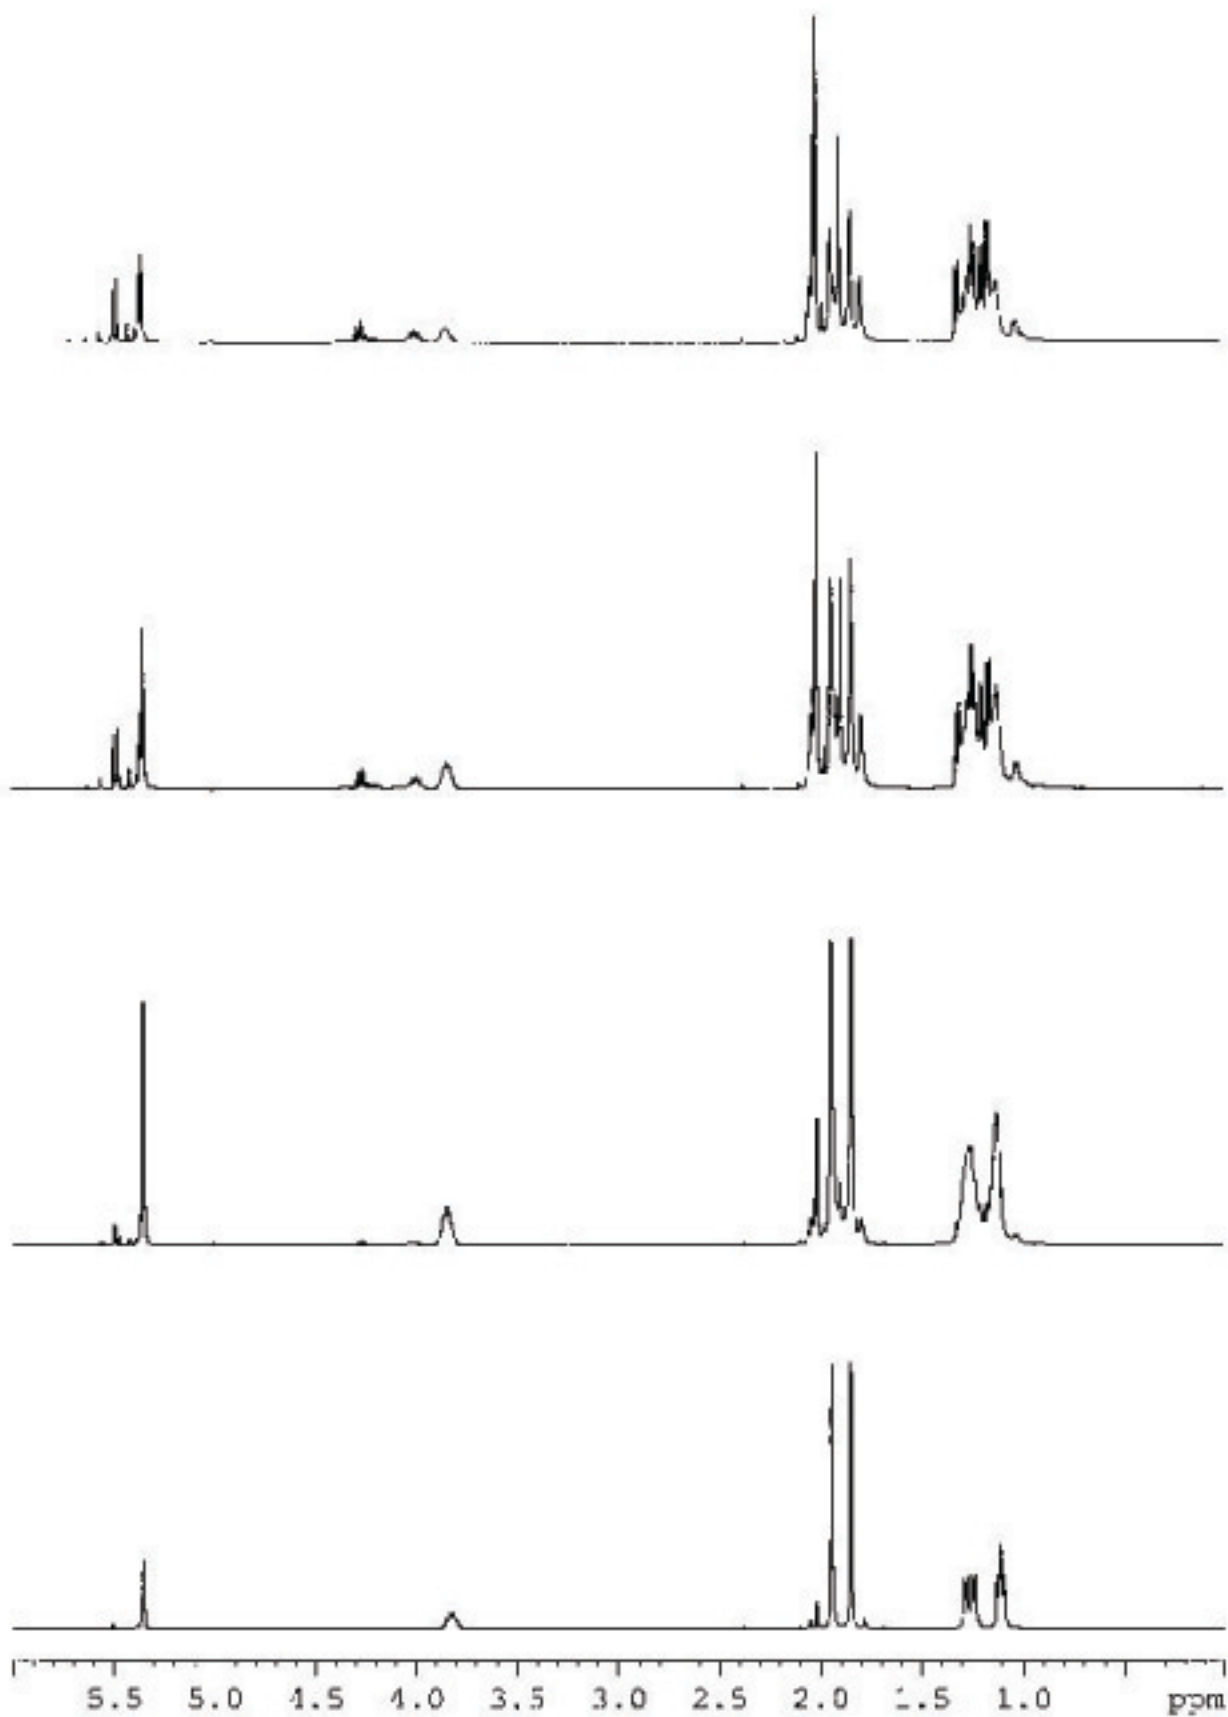

\* marks the signals corresponding to Al(acac)

Supplement: figfs1.pdf [file figfs1.pdf]

50°C, 60 min

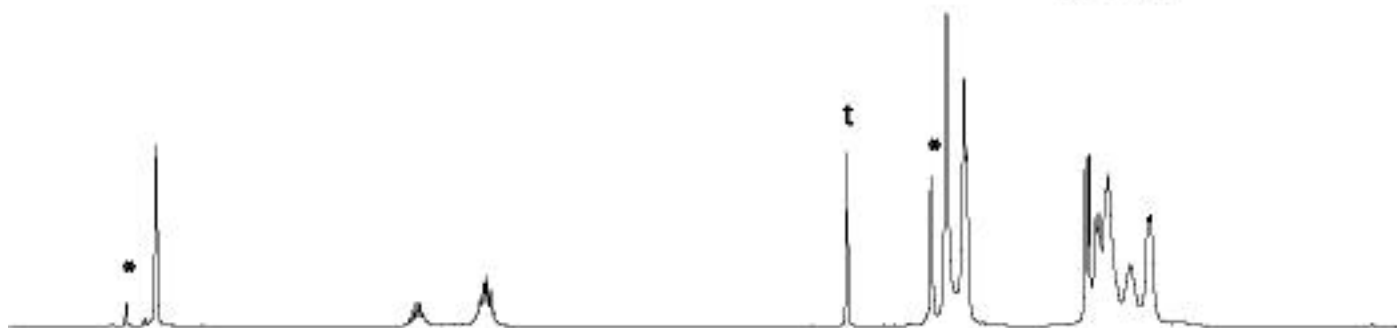

50°C, 20 min

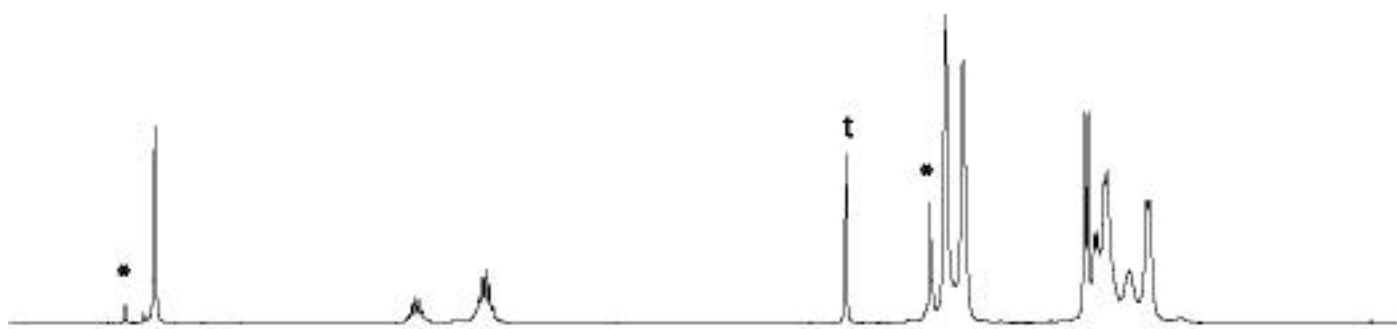

30°C, 1 min

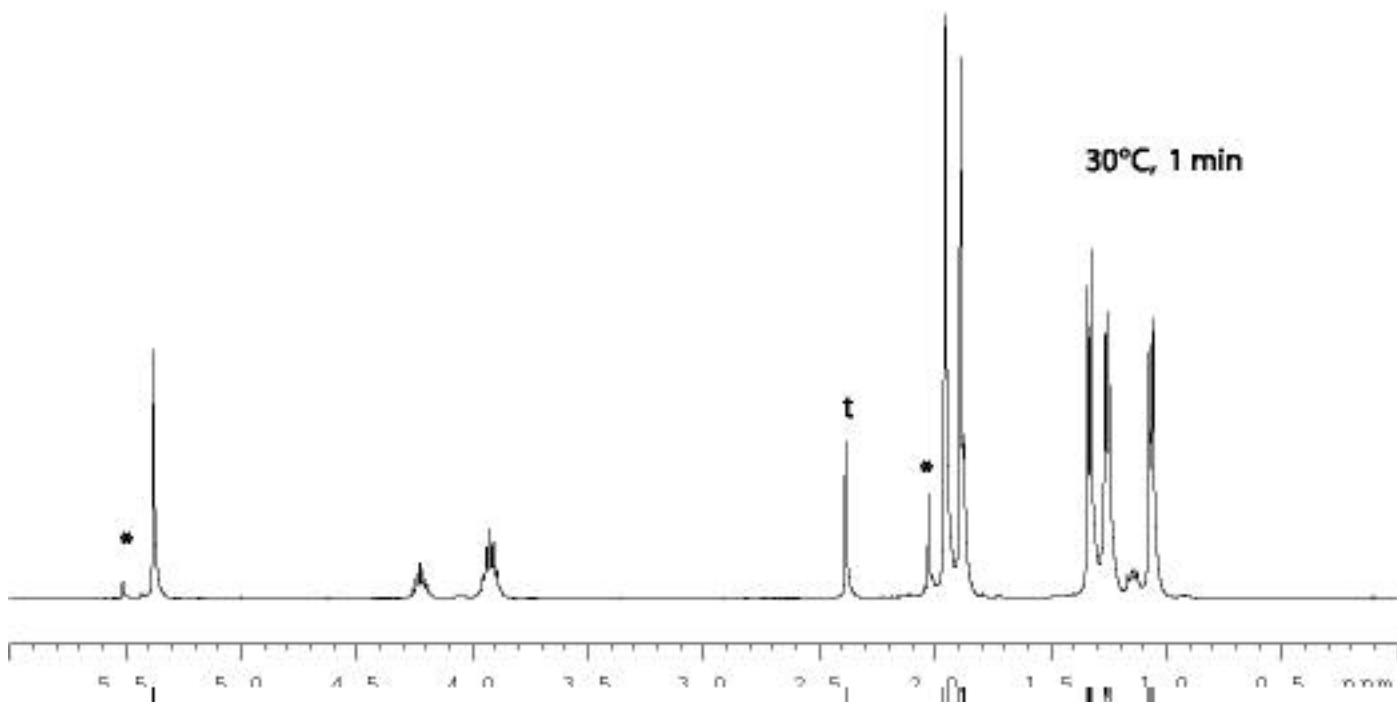

Supplement: figfs2.pdf [file figfs2.pdf]

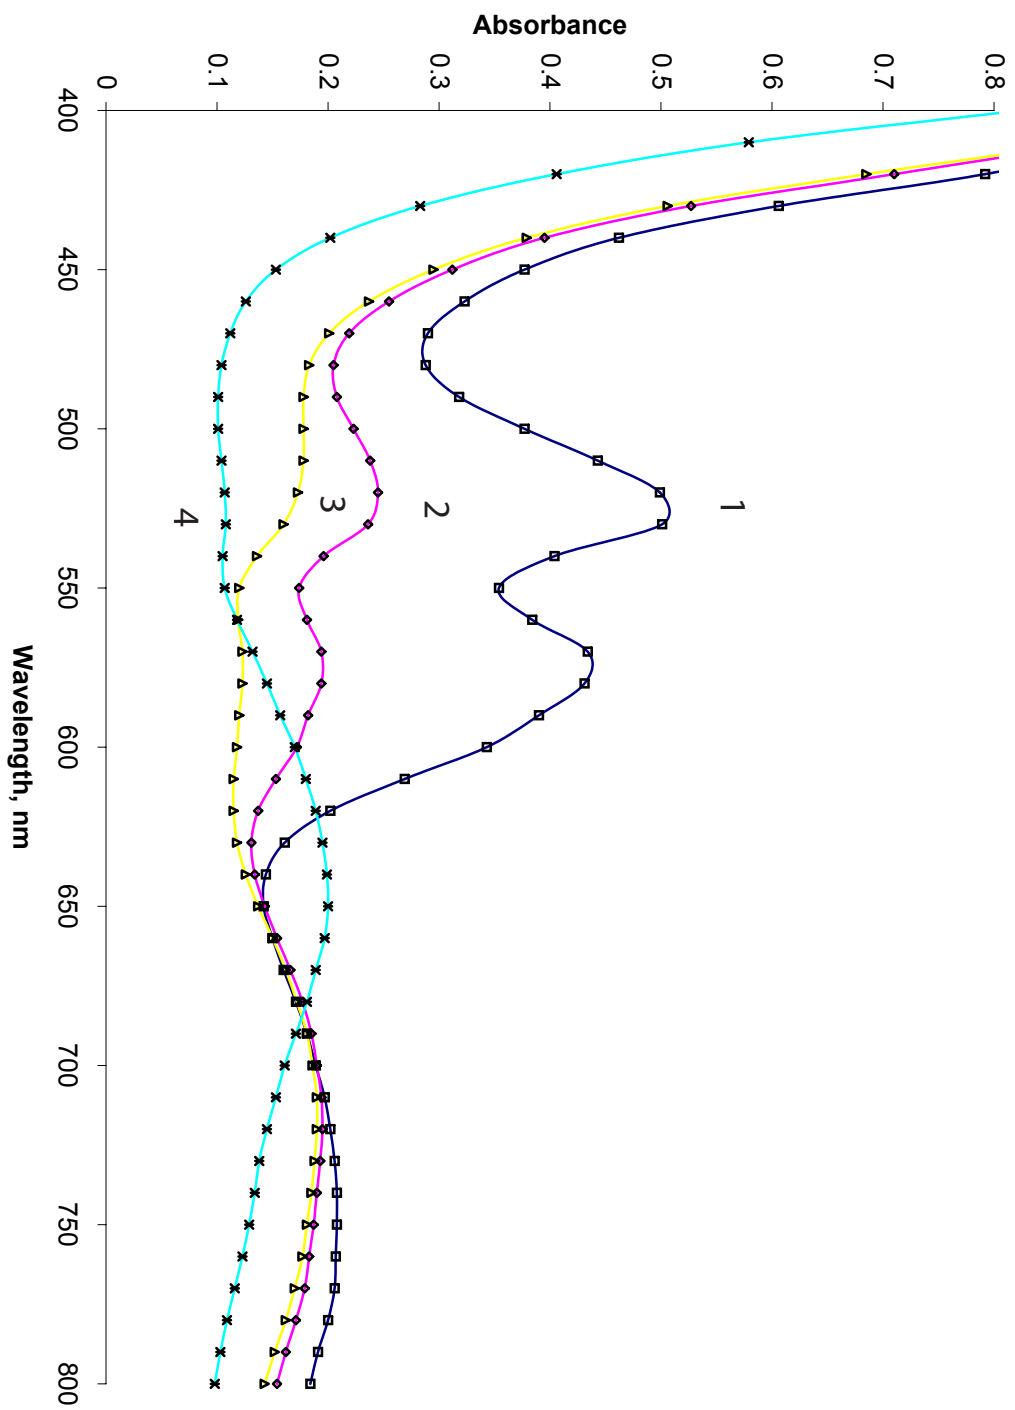

Supplement: figfs3.pdf [file figfs3.pdf]
